# Supplementary material for: Erythro–Magneto–HA–Virosome: A Bio-Inspired Drug Delivery System for Active Targeting of Drugs in the Lungs
Source: MDPI journal article supplement (doi:10.3390/ijms23179893), 2022-08-31
Supplement: s1 [file s1]

## Supplementary Figures

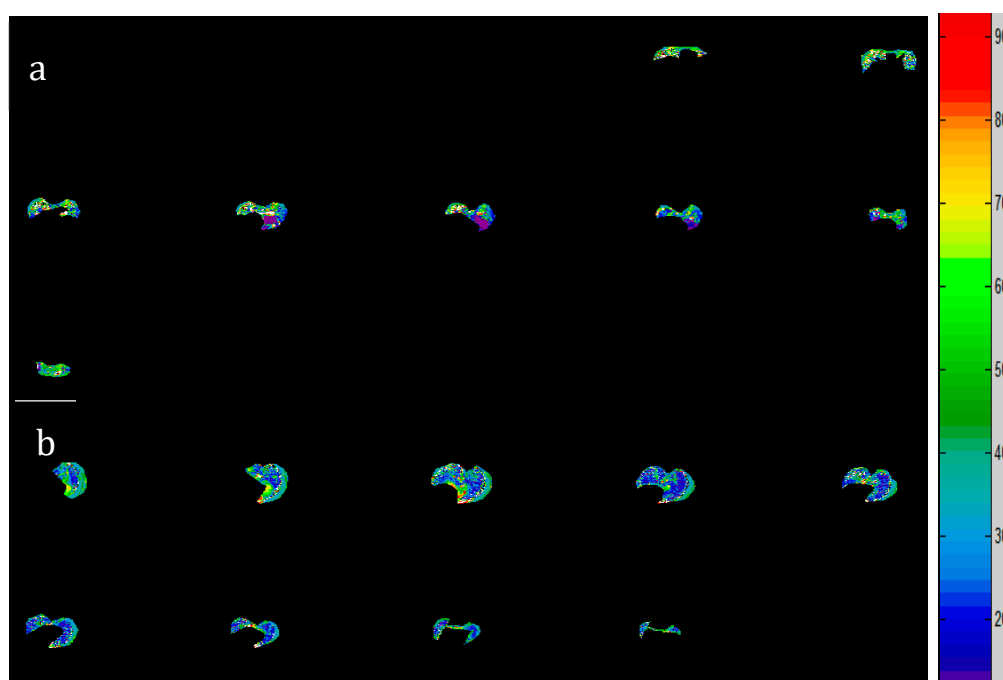

**Figure S1:** NMR Description of the T2 signal mapping for the entire frontal to caudal scanning of the mouse lung. (a) T2 was recorded after EMHV administration without application of the magnetic field; (b) T2 was recorded after EMHV administration and application of the magnetic field for 30 min. These images were used to create the 3D reconstruction of the images in figure 5c .

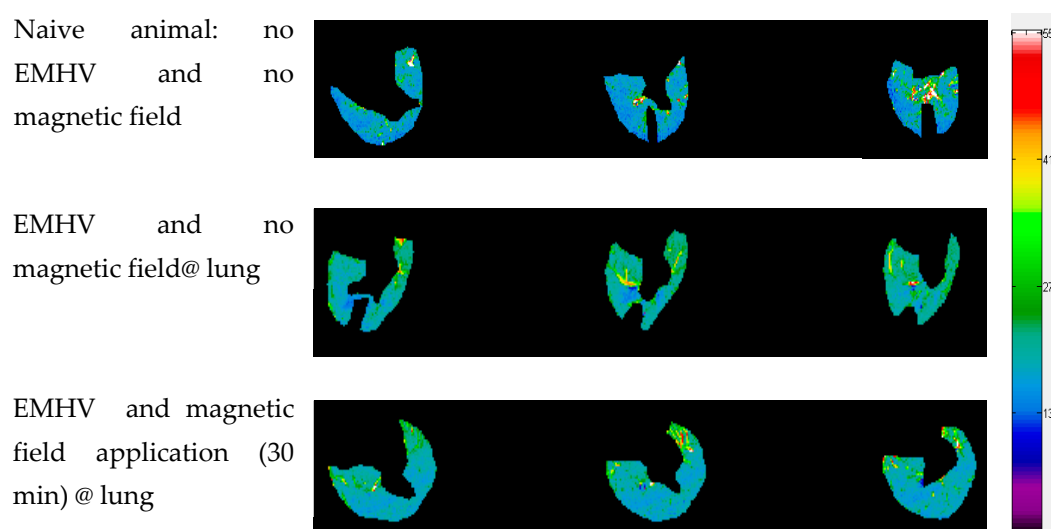

**Figure S2:** NMR Description of the T2 signal mapping of selected frontal to caudal sections of the mouse liver. (a) images of T2 map in a naive mouse. (b) after EMHV administration without application of the magnetic field; (c) after EMHV administration and application of the magnetic field for 30 min @ lung. In a, b and c, the T2 signal maps do not show any evident perturbation showing that no preferential accumulation was detected in any of the cases due to EMHV (b,c) when compared to naïve (a, control). These results demonstrate that circulating EMHV do not accumulate in the liver with or without application of magnetic field

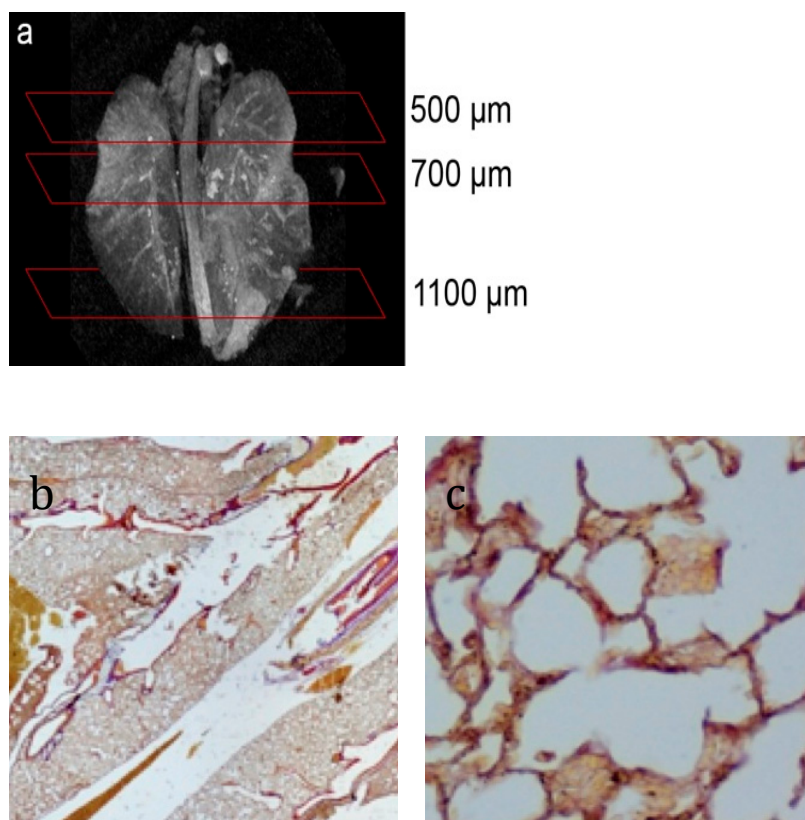

**Figure S3:** (a) CT imaging of paraformaldehyde fixed lungs embedded in paraffin to study the presence of EMHV accumulation. Immuno-histochemical investigation (b,c) shows no enrichment of EMHV at 1100 by Perl's Prussian Blue reactivity due to Iron particles. (b) 20 $\times$  and (c) 40 $\times$  magnification
